# Supplementary material for: New Insight into the Performance and Self-Defensive Responses of the Algal–Bacterial Granular Sludge Process under Cr(VI)-Induced Stress
Source: MDPI journal article supplement (doi:10.3390/su152416754), 2023-12-12
Supplement: s1 [file s1]

## Supplementary Materials

### New Insight into the Performance and Self-Defensive Responses of Algal-Bacterial Granular Sludge Process under Cr(VI)-Induced Stress

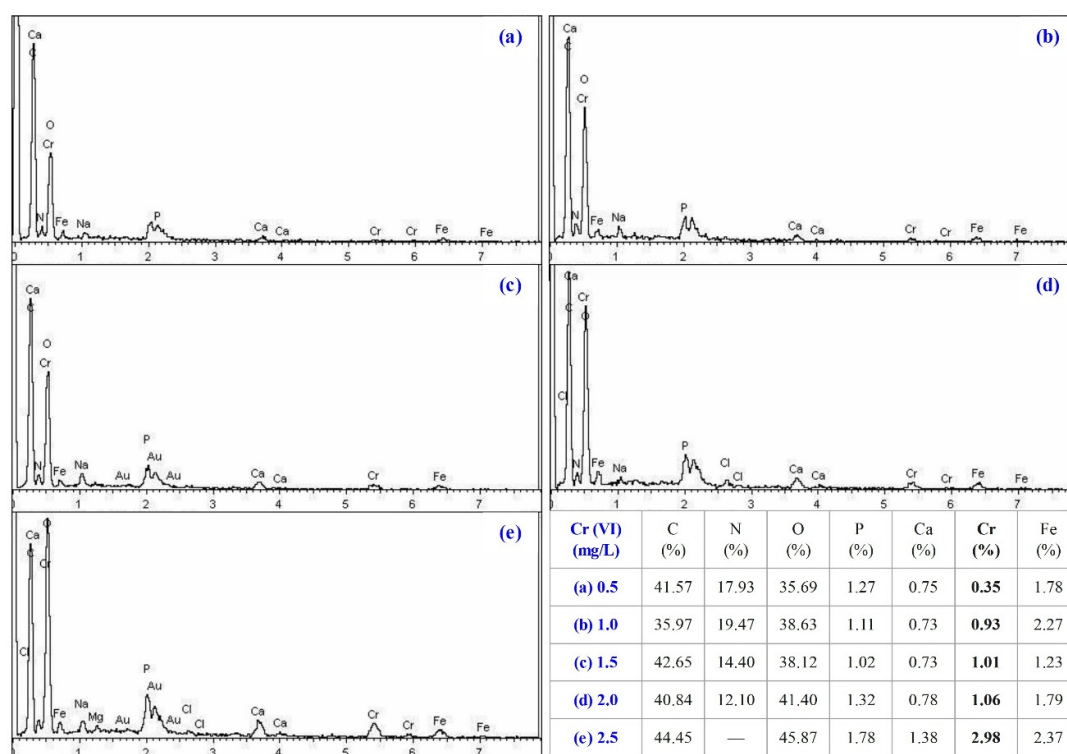

**Figure S1** Energy dispersive X-ray spectra (EDS) of algal-bacterial granular sludge.

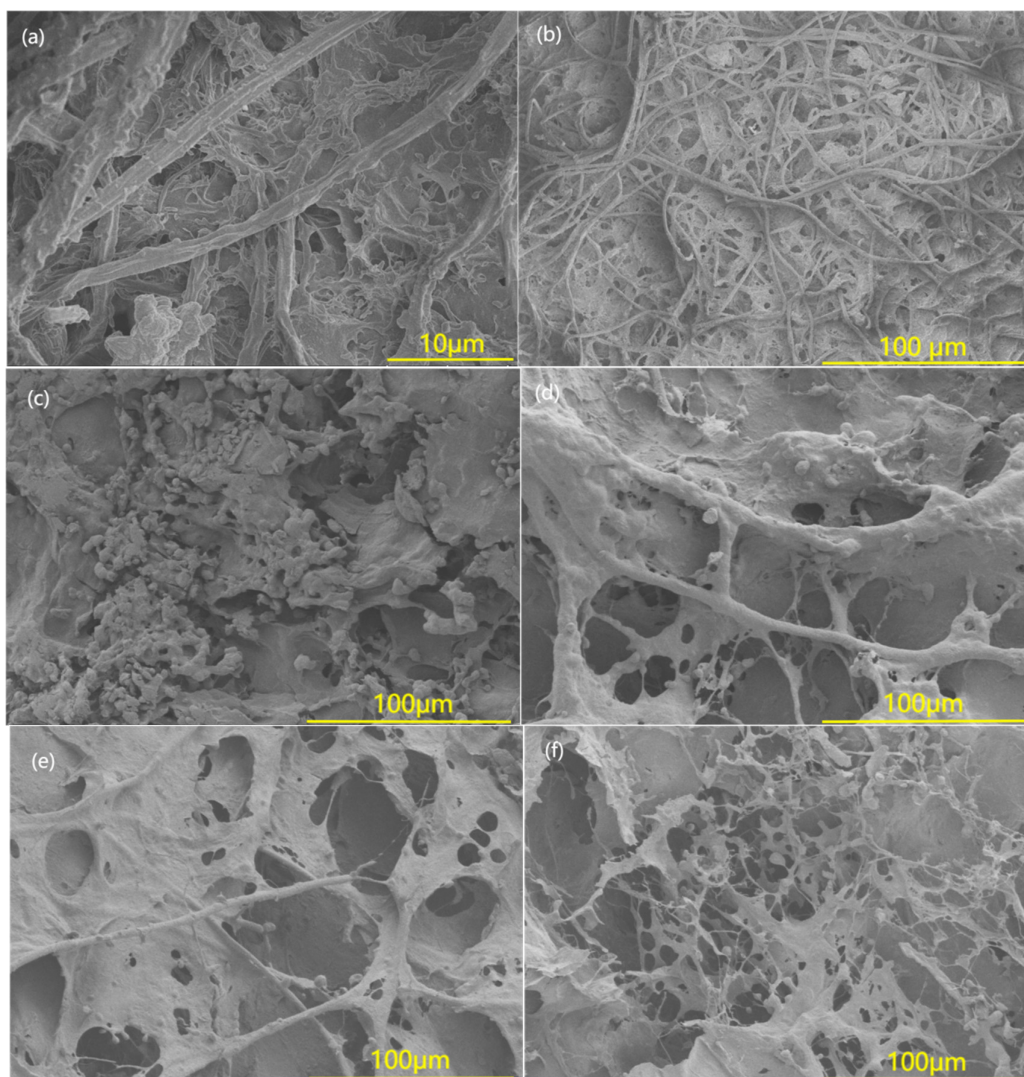

**Figure S2** SEM images of algal-bacterial granular sludge at the initial Cr(VI) concentration of 0 (a), 0.5 (b), 1.0 (c), 1.5 (d), 2.0(e) and 2.5 mg/L (f).

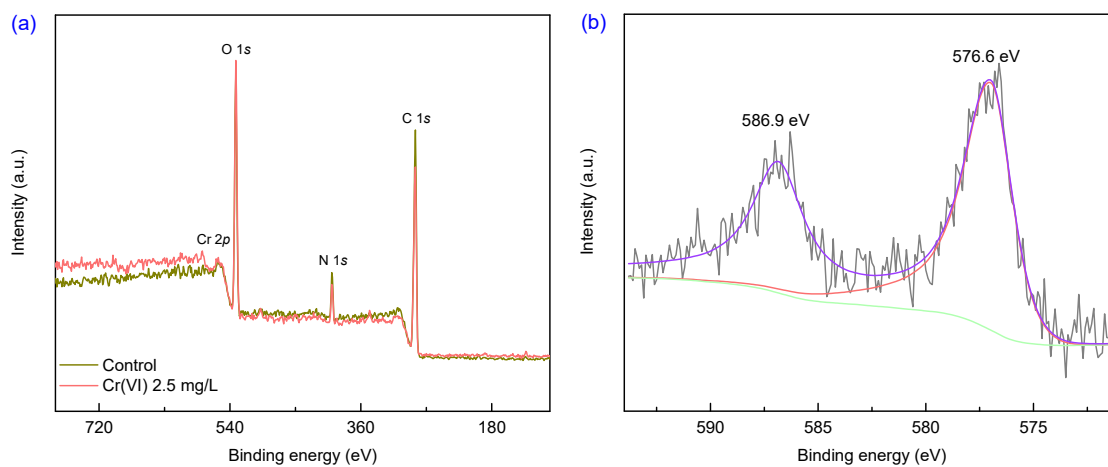

**Figure S3** Full spectrometric surveying (a) and Cr 2*p* XPS spectra of algal-bacterial granular sludge cultivated with 2.5 mg/L of Cr (VI) for ninety days (b).

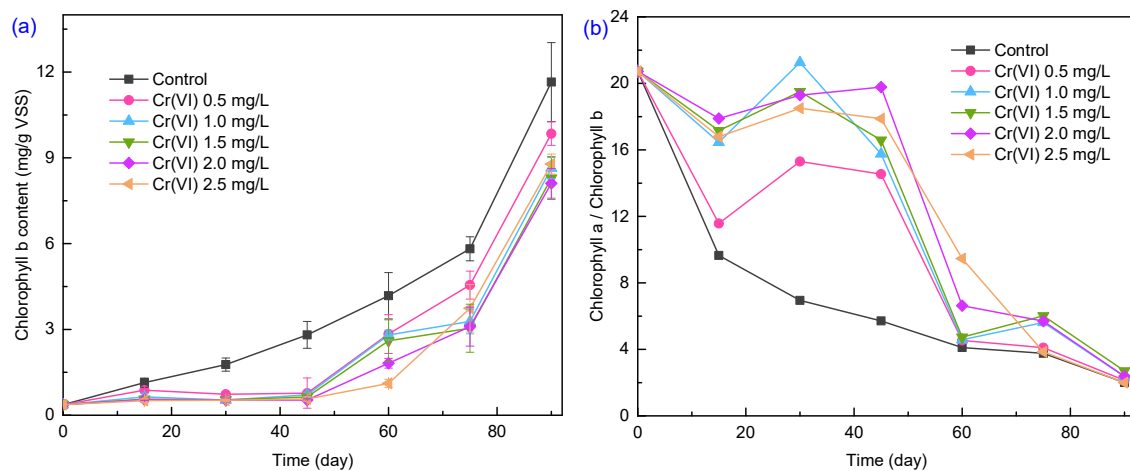

**Figure S4** Chlorophyll b content (a) and the ratio of chlorophyll a and chlorophyll b (b)

of the algal-bacterial granular sludge.

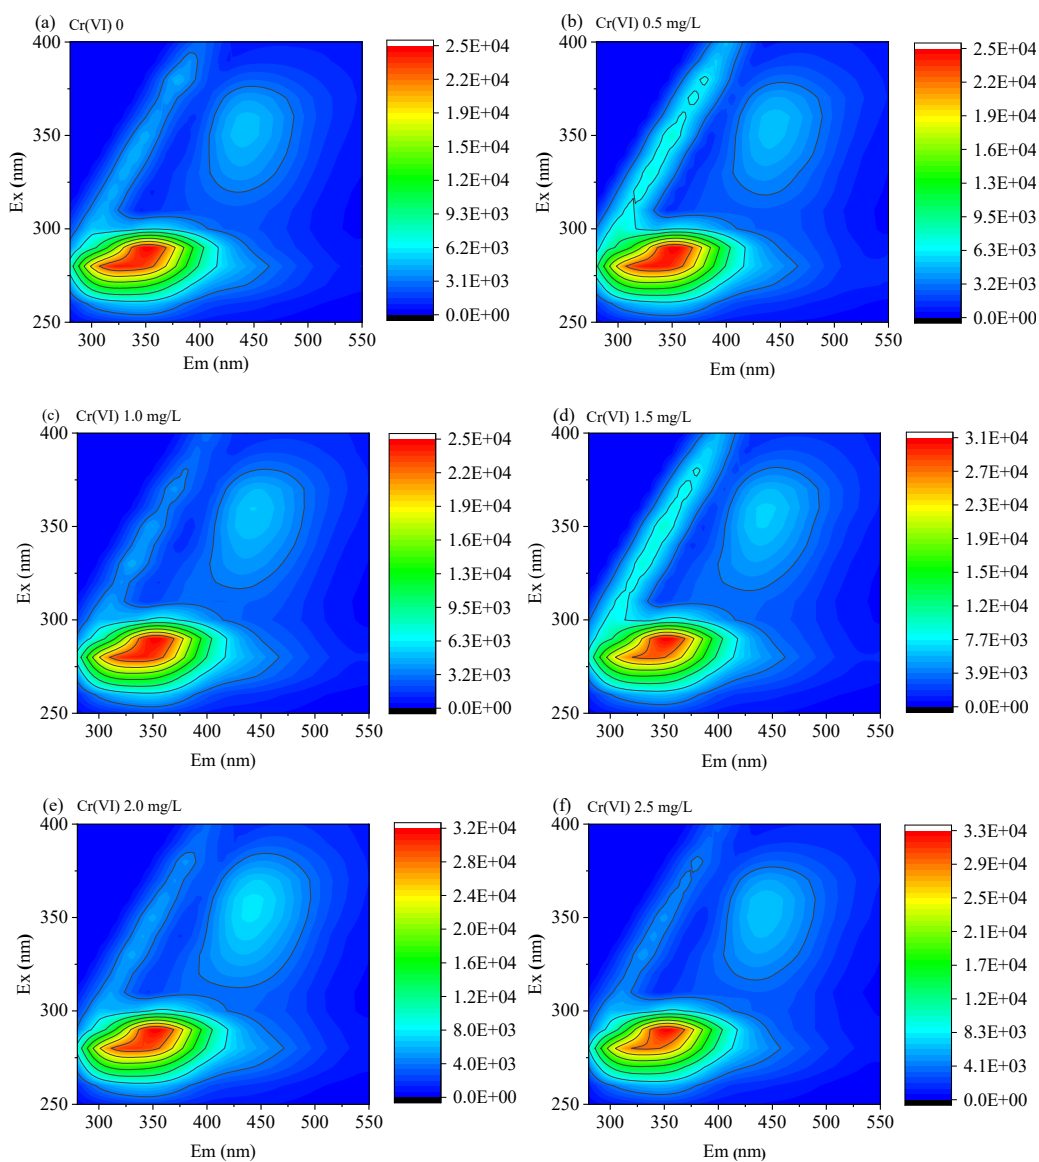

**Figure S5** 3D-EEM fluorescence spectra of EPS after ninety day-operation at Cr(VI)

concentrations of 0 (a), 0.5 (b), 1.0 (c), 1.5 (d), 2.0 (e) and 2.5 mg/L (f).

**Table S1** Fluorescence spectra parameters of EPS in algal-bacterial granular sludge.

| Cr (VI)-exposed<br>concentration (mg/L) | Peak A  |           | Peak B  |           |
|-----------------------------------------|---------|-----------|---------|-----------|
|                                         | Ex/Em   | Intensity | Ex/Em   | Intensity |
| 0                                       | 290/352 | 24645     | 360/444 | 4827      |
| 0.5                                     | 290/352 | 25161     | 360/444 | 5014      |
| 1.0                                     | 290/352 | 25253     | 360/444 | 5289      |
| 1.5                                     | 290/352 | 30756     | 360/444 | 6619      |
| 2.0                                     | 290/352 | 31757     | 360/442 | 7516      |
| 2.5                                     | 290/352 | 33020     | 360/444 | 6726      |
